# Supplementary material
Source: PubMed Central journal article supplement (PMC7752817)
Supplement: NIHMS1635941-supplement-1.pdf [file NIHMS1635941-supplement-1.pdf]

**Figure S1.** Flow chart showing number and how participants were selected for this analysis.

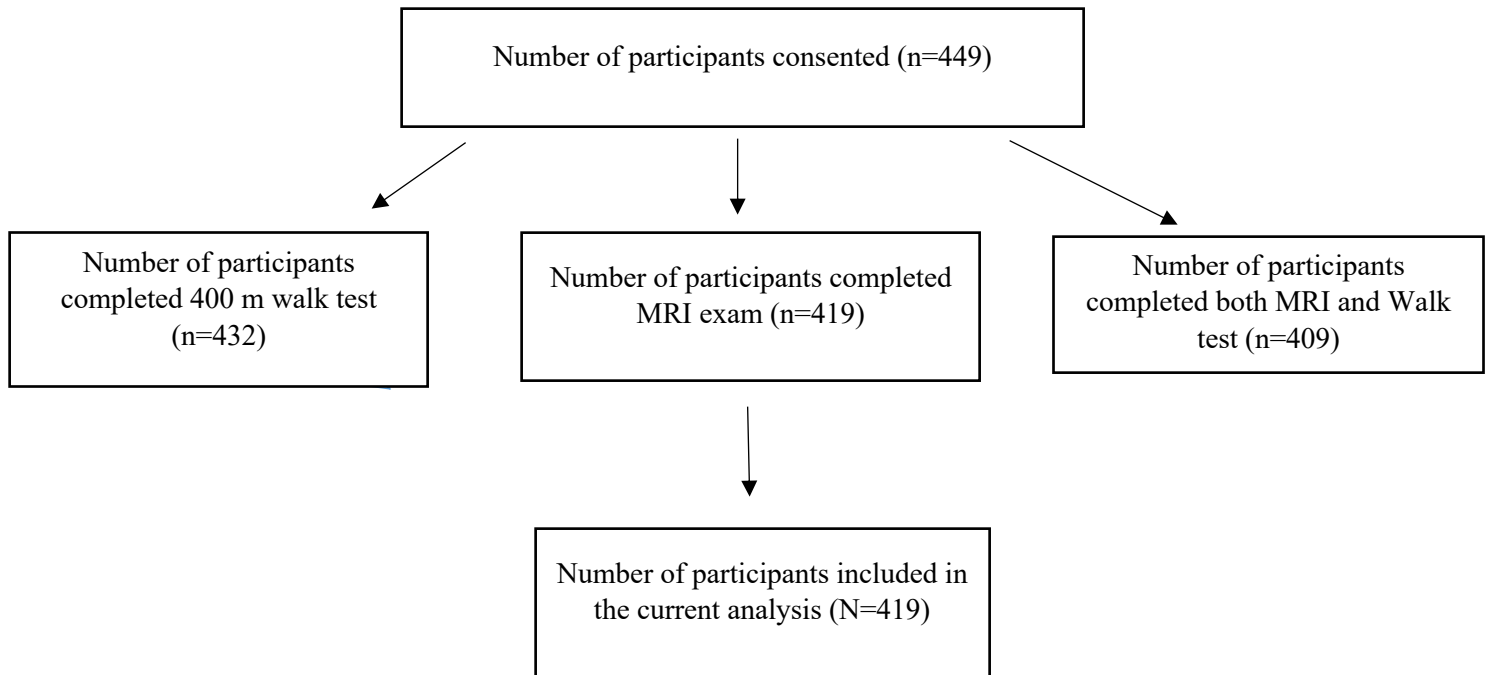

**Table S1. MRI fat by BMI category stratified by sex**

| <b>Males</b>   | <b>less than 25<br/>(Underweight)<br/>(N=33)</b> | <b>25 to less than 30 (Over<br/>(N=104)</b> | <b>Greater than 30 (Obese)<br/>(N=111)</b> | <b>p-value</b>      |
|----------------|--------------------------------------------------|---------------------------------------------|--------------------------------------------|---------------------|
| SAT            | 3141.1[2177.9,5383.2]                            | 6372.4[5202.3,7943.8]                       | 11373.8[8388.4,14845.0]                    | <0.001 <sup>b</sup> |
| VAT            | 3666.3[2360.3,5467.1]                            | 6266.4[5000.7,8112.7]                       | 9232.3[6588.0,12528.3]                     | <0.001 <sup>b</sup> |
| <b>Females</b> | <b>less than 25<br/>(Underweight)<br/>(N=28)</b> | <b>25 to less than 30 (Over<br/>(N=46)</b>  | <b>Greater than 30 (Obese)<br/>(N=96)</b>  | <b>p-value</b>      |
| SAT            | 5826.4[4391.8,8247.8]                            | 10026.3[8438.2,13077.4]                     | 15579.3[12283.7,20468.1]                   | <0.001 <sup>b</sup> |
| VAT            | 1949.4[1556.2,4031.5]                            | 4399.5[3392.9,6179.8]                       | 5305.1[4048.8,7400.2]                      | <0.001 <sup>b</sup> |

Statistics presented as Median [P25, P75], p-values: b=Kruskal-Wallis test,

**Table S2. MRI fat by waist circumference (<88cm or <102cm) category stratified by sex**

| <b>Male</b>   | <b>Above Normal WC<br/>(N=136)</b> | <b>Normal Waist C<br/>(N=93)</b> | <b>p-value</b>      |
|---------------|------------------------------------|----------------------------------|---------------------|
| SAT           | 9830.7[7014.9,13365.1]             | 5458.2[3985.1,6844.2]            | <0.001 <sup>b</sup> |
| VAT           | 8416.6[6447.8,11274.0]             | 5121.8[3622.5,6627.0]            | <0.001 <sup>b</sup> |
|               |                                    |                                  |                     |
| <b>Female</b> | <b>Above Normal WC<br/>(N=124)</b> | <b>Normal Waist C<br/>(N=26)</b> | <b>p-value</b>      |
| SAT           | 14047.3[10121.9,18650.2]           | 6188.8[5028.7,9891.9]            | <0.001 <sup>b</sup> |
| VAT           | 5219.9[3924.7,7112.7]              | 1979.5[1513.8,3859.3]            | <0.001 <sup>b</sup> |

Statistics presented as Median [P25, P75], p-values: b=Kruskal-Wallis test,

**Table S3.** Multivariable linear regression of different quartiles of adipokines, insulin resistance, inflammatory markers (log-transformed) and lipid profile with VAT, SAT, liver fat, and physical function

| <i>Quartile vs. Q1</i> | <i>Outcome</i>    | <i>N Used</i> | <i>Estimate</i> | <i>StdErr</i> | <i>Probt</i> |
|------------------------|-------------------|---------------|-----------------|---------------|--------------|
| <b>SAT</b>             |                   |               |                 |               |              |
| Q2                     | HMW Adiponectin   | 402           | -0.20           | 0.12          | 0.084        |
| Q3                     | HMW Adiponectin   | 402           | -0.22           | 0.12          | 0.057        |
| Q4                     | HMW Adiponectin   | 402           | -0.60           | 0.12          | <0.001       |
| Q2                     | HOMA IR           | 373           | 0.19            | 0.13          | 0.13         |
| Q3                     | HOMA IR           | 373           | 0.19            | 0.13          | 0.13         |
| Q4                     | HOMA IR           | 373           | 0.54            | 0.13          | <0.001       |
| Q2                     | IL-6              | 403           | 0.00            | 0.12          | 0.99         |
| Q3                     | IL-6              | 403           | 0.10            | 0.12          | 0.42         |
| Q4                     | IL-6              | 403           | 0.16            | 0.12          | 0.19         |
| Q2                     | Leptin            | 403           | 0.71            | 0.13          | <0.001       |
| Q3                     | Leptin            | 403           | 1.09            | 0.13          | <0.001       |
| Q4                     | Leptin            | 403           | 1.8             | 0.13          | <0.001       |
| Q2                     | Resistin          | 402           | -0.12           | 0.07          | 0.094        |
| Q3                     | Resistin          | 402           | 0.04            | 0.08          | 0.64         |
| Q4                     | Resistin          | 402           | 0.05            | 0.08          | 0.50         |
| Q2                     | TNFAR1            | 403           | -0.09           | 0.04          | 0.025        |
| Q3                     | TNFAR1            | 403           | -0.04           | 0.04          | 0.25         |
| Q4                     | TNFAR1            | 403           | -0.02           | 0.04          | 0.64         |
| Q2                     | TNFAR2            | 402           | -0.02           | 0.06          | 0.68         |
| Q3                     | TNFAR2            | 402           | 0.00            | 0.06          | 0.96         |
| Q4                     | TNFAR2            | 402           | -0.02           | 0.06          | 0.76         |
| Q2                     | Total adiponectin | 402           | -0.20           | 0.11          | 0.070        |
| Q3                     | Total adiponectin | 402           | -0.23           | 0.11          | 0.044        |
| Q4                     | Total adiponectin | 402           | -0.59           | 0.12          | <0.001       |
| Q2                     | HDL cholesterol   | 376           | -0.07           | 0.05          | 0.12         |
| Q3                     | HDL cholesterol   | 376           | -0.12           | 0.05          | 0.014        |
| Q4                     | HDL cholesterol   | 376           | -0.17           | 0.05          | <0.001       |
| Q2                     | LDL cholesterol   | 375           | 3.1             | 6.0           | 0.60         |
| Q3                     | LDL cholesterol   | 375           | 9.3             | 6.1           | 0.13         |
| Q4                     | LDL cholesterol   | 375           | 6.8             | 6.3           | 0.28         |
| Q2                     | Triglycerides     | 375           | 0.08            | 0.07          | 0.26         |
| Q3                     | Triglycerides     | 375           | 0.15            | 0.07          | 0.047        |
| Q4                     | Triglycerides     | 375           | 0.28            | 0.08          | <0.001       |
| <b>VAT</b>             |                   |               |                 |               |              |
| Q2                     | HMW Adiponectin   | 402           | -0.47           | 0.11          | <0.001       |
| Q3                     | HMW Adiponectin   | 402           | -0.68           | 0.12          | <0.001       |
| Q4                     | HMW Adiponectin   | 402           | -0.87           | 0.12          | <0.001       |
| Q2                     | HOMA IR           | 373           | 0.32            | 0.13          | 0.014        |

| <i>Quartile vs. Q1</i> | <i>Outcome</i>    | <i>N Used</i> | <i>Estimate</i> | <i>StdErr</i> | <i>Probt</i> |
|------------------------|-------------------|---------------|-----------------|---------------|--------------|
| Q3                     | HOMA IR           | 373           | 0.44            | 0.13          | <0.001       |
| Q4                     | HOMA IR           | 373           | 0.60            | 0.13          | <0.001       |
|                        |                   |               |                 |               |              |
| Q2                     | IL-6              | 403           | 0.23            | 0.12          | 0.055        |
| Q3                     | IL-6              | 403           | 0.00            | 0.12          | 0.98         |
| Q4                     | IL-6              | 403           | 0.12            | 0.13          | 0.32         |
|                        |                   |               |                 |               |              |
| Q2                     | Leptin            | 403           | 0.58            | 0.14          | <0.001       |
| Q3                     | Leptin            | 403           | 0.91            | 0.15          | <0.001       |
| Q4                     | Leptin            | 403           | 1.4             | 0.15          | <0.001       |
|                        |                   |               |                 |               |              |
| Q2                     | Resistin          | 402           | 0.13            | 0.08          | 0.098        |
| Q3                     | Resistin          | 402           | 0.14            | 0.08          | 0.076        |
| Q4                     | Resistin          | 402           | 0.16            | 0.08          | 0.046        |
|                        |                   |               |                 |               |              |
| Q2                     | TNFAR1            | 403           | -0.01           | 0.04          | 0.82         |
| Q3                     | TNFAR1            | 403           | -0.01           | 0.04          | 0.86         |
| Q4                     | TNFAR1            | 403           | 0.01            | 0.04          | 0.85         |
|                        |                   |               |                 |               |              |
| Q2                     | TNFAR2            | 402           | 0.07            | 0.06          | 0.24         |
| Q3                     | TNFAR2            | 402           | 0.04            | 0.06          | 0.55         |
| Q4                     | TNFAR2            | 402           | -0.01           | 0.06          | 0.90         |
|                        |                   |               |                 |               |              |
| Q2                     | Total adiponectin | 402           | -0.39           | 0.11          | <0.001       |
| Q3                     | Total adiponectin | 402           | -0.60           | 0.11          | <0.001       |
| Q4                     | Total adiponectin | 402           | -0.79           | 0.12          | <0.001       |
|                        |                   |               |                 |               |              |
| Q2                     | HDL cholesterol   | 376           | -0.11           | 0.05          | 0.015        |
| Q3                     | HDL cholesterol   | 376           | -0.14           | 0.05          | 0.004        |
| Q4                     | HDL cholesterol   | 376           | -0.21           | 0.05          | <0.001       |
|                        |                   |               |                 |               |              |
| Q2                     | LDL cholesterol   | 375           | 12.3            | 6.0           | 0.043        |
| Q3                     | LDL cholesterol   | 375           | 10.8            | 6.3           | 0.086        |
| Q4                     | LDL cholesterol   | 375           | 6.1             | 6.4           | 0.34         |
|                        |                   |               |                 |               |              |
| Q2                     | Triglycerides     | 375           | 0.17            | 0.07          | 0.016        |
| Q3                     | Triglycerides     | 375           | 0.31            | 0.07          | <0.001       |
| Q4                     | Triglycerides     | 375           | 0.42            | 0.08          | <0.001       |
|                        |                   |               |                 |               |              |
|                        | <b>Liver fat</b>  |               |                 |               |              |
| Q2                     | HMW Adiponectin   | 402           | -0.30           | 0.12          | 0.014        |
| Q3                     | HMW Adiponectin   | 402           | -0.38           | 0.13          | 0.004        |
| Q4                     | HMW Adiponectin   | 402           | -0.48           | 0.13          | <0.001       |
|                        |                   |               |                 |               |              |
| Q2                     | HOMA IR           | 373           | 0.26            | 0.13          | 0.044        |
| Q3                     | HOMA IR           | 373           | 0.30            | 0.14          | 0.031        |
| Q4                     | HOMA IR           | 373           | 0.52            | 0.14          | <0.001       |
|                        |                   |               |                 |               |              |
| Q2                     | IL-6              | 403           | -0.20           | 0.12          | 0.11         |
| Q3                     | IL-6              | 403           | -0.09           | 0.13          | 0.50         |
| Q4                     | IL-6              | 403           | -0.16           | 0.13          | 0.22         |
|                        |                   |               |                 |               |              |
| Q2                     | Leptin            | 403           | 0.45            | 0.16          | 0.004        |

| <i>Quartile vs. Q1</i> | <i>Outcome</i>    | <i>N Used</i> | <i>Estimate</i> | <i>StdErr</i> | <i>Probt</i> |
|------------------------|-------------------|---------------|-----------------|---------------|--------------|
| Q3                     | Leptin            | 403           | 0.54            | 0.17          | 0.001        |
| Q4                     | Leptin            | 403           | 0.67            | 0.17          | <0.001       |
|                        |                   |               |                 |               |              |
| Q2                     | Resistin          | 402           | 0.02            | 0.08          | 0.76         |
| Q3                     | Resistin          | 402           | -0.05           | 0.08          | 0.54         |
| Q4                     | Resistin          | 402           | 0.07            | 0.08          | 0.40         |
|                        |                   |               |                 |               |              |
| Q2                     | TNFAR1            | 403           | -0.02           | 0.04          | 0.70         |
| Q3                     | TNFAR1            | 403           | -0.04           | 0.04          | 0.32         |
| Q4                     | TNFAR1            | 403           | -0.03           | 0.04          | 0.52         |
|                        |                   |               |                 |               |              |
| Q2                     | TNFAR2            | 402           | -0.11           | 0.06          | 0.066        |
| Q3                     | TNFAR2            | 402           | -0.07           | 0.06          | 0.30         |
| Q4                     | TNFAR2            | 402           | -0.06           | 0.06          | 0.32         |
|                        |                   |               |                 |               |              |
| Q2                     | Total adiponectin | 402           | -0.28           | 0.12          | 0.016        |
| Q3                     | Total adiponectin | 402           | -0.38           | 0.12          | 0.002        |
| Q4                     | Total adiponectin | 402           | -0.45           | 0.13          | <0.001       |
|                        |                   |               |                 |               |              |
| Q2                     | HDL cholesterol   | 376           | -0.03           | 0.05          | 0.49         |
| Q3                     | HDL cholesterol   | 376           | -0.10           | 0.05          | 0.045        |
| Q4                     | HDL cholesterol   | 376           | -0.09           | 0.05          | 0.069        |
|                        |                   |               |                 |               |              |
| Q2                     | LDL cholesterol   | 375           | 15.6            | 6.1           | 0.011        |
| Q3                     | LDL cholesterol   | 375           | 17.0            | 6.5           | 0.010        |
| Q4                     | LDL cholesterol   | 375           | 13.0            | 6.5           | 0.048        |
|                        |                   |               |                 |               |              |
| Q2                     | Triglycerides     | 375           | 0.10            | 0.07          | 0.17         |
| Q3                     | Triglycerides     | 375           | 0.21            | 0.08          | 0.008        |
| Q4                     | Triglycerides     | 375           | 0.23            | 0.08          | 0.004        |

400 m walk test

| <i>Quartile vs. Q1</i> | <i>Outcome</i>  | <i>N Used</i> | <i>Estimate</i> | <i>StdErr</i> | <i>Probt</i> |
|------------------------|-----------------|---------------|-----------------|---------------|--------------|
| Q2                     | HMW Adiponectin | 392           | -0.02           | 0.12          | 0.84         |
| Q3                     | HMW Adiponectin | 392           | 0.09            | 0.12          | 0.46         |
| Q4                     | HMW Adiponectin | 392           | 0.13            | 0.13          | 0.33         |
|                        |                 |               |                 |               |              |
| Q2                     | HOMA IR         | 363           | 0.05            | 0.13          | 0.67         |
| Q3                     | HOMA IR         | 363           | 0.02            | 0.13          | 0.89         |
| Q4                     | HOMA IR         | 363           | -0.19           | 0.14          | 0.18         |
|                        |                 |               |                 |               |              |
| Q2                     | IL-6            | 393           | 0.07            | 0.12          | 0.57         |
| Q3                     | IL-6            | 393           | 0.37            | 0.12          | 0.002        |
| Q4                     | IL-6            | 393           | 0.27            | 0.13          | 0.041        |
|                        |                 |               |                 |               |              |
| Q2                     | Leptin          | 393           | 0.31            | 0.12          | 0.013        |
| Q3                     | Leptin          | 393           | 0.12            | 0.12          | 0.35         |
| Q4                     | Leptin          | 393           | 0.24            | 0.14          | 0.079        |
|                        |                 |               |                 |               |              |

| <i>Quartile vs. Q1</i> | <i>Outcome</i>    | <i>N Used</i> | <i>Estimate</i> | <i>StdErr</i> | <i>Probt</i> |
|------------------------|-------------------|---------------|-----------------|---------------|--------------|
| Q2                     | Resistin          | 392           | -0.11           | 0.08          | 0.15         |
| Q3                     | Resistin          | 392           | -0.03           | 0.08          | 0.75         |
| Q4                     | Resistin          | 392           | 0.02            | 0.09          | 0.86         |
|                        |                   |               |                 |               |              |
| Q2                     | TNFAR1            | 393           | 0.04            | 0.04          | 0.34         |
| Q3                     | TNFAR1            | 393           | 0.10            | 0.04          | 0.010        |
| Q4                     | TNFAR1            | 393           | 0.15            | 0.04          | <0.001       |
|                        |                   |               |                 |               |              |
| Q2                     | TNFAR2            | 392           | -0.05           | 0.06          | 0.37         |
| Q3                     | TNFAR2            | 392           | 0.03            | 0.06          | 0.60         |
| Q4                     | TNFAR2            | 392           | -0.02           | 0.07          | 0.74         |
|                        |                   |               |                 |               |              |
| Q2                     | Total adiponectin | 392           | -0.05           | 0.11          | 0.67         |
| Q3                     | Total adiponectin | 392           | 0.05            | 0.12          | 0.64         |
| Q4                     | Total adiponectin | 392           | 0.22            | 0.13          | 0.092        |
|                        |                   |               |                 |               |              |
| Q2                     | HDL cholesterol   | 366           | -0.00           | 0.05          | 0.98         |
| Q3                     | HDL cholesterol   | 366           | -0.01           | 0.05          | 0.92         |
| Q4                     | HDL cholesterol   | 366           | -0.06           | 0.05          | 0.28         |
|                        |                   |               |                 |               |              |
| Q2                     | LDL cholesterol   | 366           | 8.3             | 6.3           | 0.19         |
| Q3                     | LDL cholesterol   | 366           | 0.59            | 6.3           | 0.93         |
| Q4                     | LDL cholesterol   | 366           | 2.0             | 7.1           | 0.78         |
|                        |                   |               |                 |               |              |
| Q2                     | Triglycerides     | 366           | 0.07            | 0.08          | 0.38         |
| Q3                     | Triglycerides     | 366           | -0.06           | 0.08          | 0.41         |
| Q4                     | Triglycerides     | 366           | 0.04            | 0.09          | 0.62         |
